# Supplementary material
Source: PubMed Central journal article supplement (PMC3384727)

## SUPPORTING INFORMATION

Product profile resulting from reaction of dG with methylglyoxal under neutral and alkaline conditions. Chromatography was carried out on an Agilent 1100 HPLC system using a 5 $\mu$  Waters Atlantis T3 column, 4.6mm x 150mm. Separation was achieved using a 0% to 20% acetonitrile gradient in 50mM TEAA pH7 over 15 minutes. (A) dG standard. (B) Time course for reaction of dG with MG (1:1, 1.5 mM) at neutral pH. Consistent with an equilibrium reaction, the cyclic MG adduct **2** was formed rapidly, but failed to accumulate over time. Only minor amounts of CE<sub>d</sub>G **1** and bis-MG adduct **3** were detected under these conditions. (C) Addition of pH 9 phosphate buffer to the neutral reaction (B) after 41h caused the rapid disappearance of **2** and an increase in peaks corresponding to bis-adduct **3** and CE<sub>d</sub>G **1** as diastereomeric mixtures. The 4 possible diastereomers of **3** were unresolved under these chromatographic conditions. (D) Initiation of the reaction in pH 9 phosphate buffer resulted in the nearly exclusive formation of **2** and **3**. (E) HPLC chromatogram of CE<sub>d</sub>G(*R*) + CE<sub>d</sub>G(*S*) standards (F) 48 hour reaction of dG (1.5mM) with MG (4mM) at 37°C and neutral pH. (G) Analysis of products resulting from 10 mM sodium periodate treatment of reaction (F) for 20 minutes. (H) HPLC chromatogram of *N*<sup>2</sup>-acetyl-dG standard.

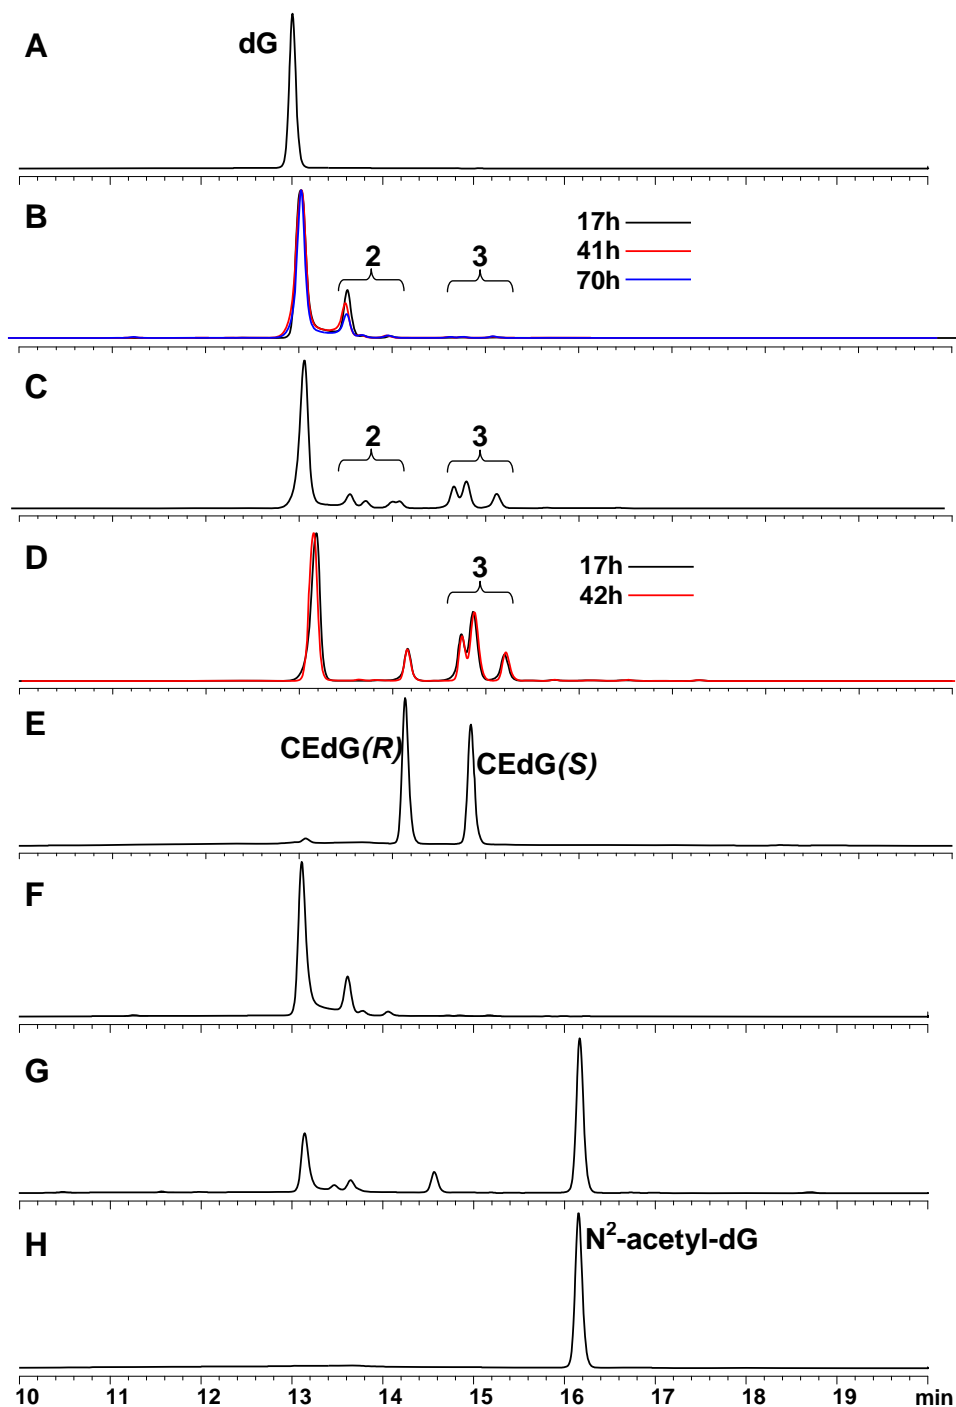

Supplement: NIHMS381992-supplement-Supporting_Info.pdf [file NIHMS381992-supplement-Supporting_Info.pdf]
